# Supplementary material for: On the interaction of softwood hemicellulose with cellulose surfaces in relation to molecular structure and physicochemical properties of hemicellulose
Source: Royal Society of Chemistry journal article supplement (doi:10.1039/d0sm00264j), 2020-01-01
Supplement: d0sm00264j1.pdf [file d0sm00264j1.pdf]

## Electronic Supplementary information

### On the interaction of softwood hemicellulose with cellulose surfaces in relation to molecular structure and physicochemical properties of hemicellulose

Polina Naidjonoka,<sup>\*a</sup> Monica Arcos Hernandez<sup>b</sup> Gunnar K. Pálsson <sup>c,d</sup>, Frank Heinrich <sup>e,f</sup>, Henrik Stålbrand<sup>\*g</sup>, Tommy Nylander<sup>\*a,h,i</sup>

<sup>a</sup> Physical Chemistry, Department of Chemistry, Lund University, Lund, Sweden.

<sup>b</sup> Polymer & Materials Chemistry, Department of Chemistry, Lund University, Lund, Sweden

<sup>c</sup> Department of Physics & Astronomy, Uppsala University, Uppsala, Sweden.

<sup>d</sup> Institut Laue Langevin, Grenoble, France.

<sup>e</sup> Department of Physics, Carnegie Mellon University, Pittsburgh PA, USA

<sup>f</sup> NIST Center for Neutron Research, Gaithersburg MD, USA

<sup>g</sup> Biochemistry and Structural Biology, Department of Chemistry, Lund University, Lund, Sweden

<sup>h</sup> NanoLund, Lund University, Lund Sweden

<sup>i</sup> Lund Institute of Advanced Neutron and X-ray Science LINXS, Lund, Sweden.

\*polina.naidjonoka@fkem1.lu.se

\*tommy.nylander@fkem1.lu.se

\*henrik.stalbrand@biochemistry.lu.se

### TMP anomeric assignment:

Table S1 <sup>1</sup>H and <sup>13</sup>C NMR data of the anomeric region for the TMP GGM

| Constituent            | <sup>1</sup> H (ppm) | <sup>13</sup> C (ppm) | Annotation             | Figure Key |
|------------------------|----------------------|-----------------------|------------------------|------------|
| mannose                | 5.19                 | 94.86                 | α-ManpR                | Mar        |
|                        | 4.94                 | 100.23                | -4)-β-Manp-(1-, 2-O-Ac | M2         |
|                        | 4.90                 | 99.64                 | -4)-β-Manp-(1-, 2-O-Ac | M2         |
|                        | 4.91                 | 94.77                 | β-ManpR                | Mbr        |
|                        | 4.84                 | 100.62                | -4)-β-Manp-(1-, 3-O-Ac | M3         |
|                        | 4.76                 | 101.20                | β-Manp-(1-             | M          |
|                        | 4.74                 | 101.30                | -4)-β-Manp-(1-         | 4Manb      |
| glucose                | 4.53                 | 103.55                | -4)-β-Glcp-(1-         | Glcb       |
|                        | 4.52                 | 103.65                | 4)-β-Glcp-(1-          | Glcb       |
| galactose              | 5.03                 | 99.84                 | αGalp-(1-              | Gala       |
| Other polysaccharides  |                      |                       |                        |            |
| arabino glucuronoxylan | 4.49                 | 102.76                | -3,4)-β-Xylp-(1-       | X34b       |
|                        | 5.28                 | 110.37                | α-Araf-(1-3            | Ara3       |
| arabinogalactan        | 5.10                 | 108.62                |                        | Ara3       |
| β-Galactan             | 4.64                 | 105.50                | -4)-β-Galp-(1-         | Galb       |

**Table S2. NMR spectra peak assignment for SP Sample**

| Constituent            | Annotation            | Figure Key | 1                    | 2                     | 3                    | 4                     | 5                    | 6a                    | 6b                   |                       |            |           |       |       |       |
|------------------------|-----------------------|------------|----------------------|-----------------------|----------------------|-----------------------|----------------------|-----------------------|----------------------|-----------------------|------------|-----------|-------|-------|-------|
|                        |                       |            | <sup>1</sup> H (ppm) | <sup>13</sup> C (ppm) |            |           |       |       |       |
| mannose                | α-Manp-R              | Mar        | 5.18                 | 94.87                 |                      |                       |                      |                       |                      |                       |            |           |       |       |       |
|                        | -4)-β-Manp-(1, 2-O-Ac | M2         | 4.94                 | 100.23                | 5.49                 | 72.82                 |                      |                       |                      |                       |            |           |       |       |       |
|                        | -4)-β-Manp-(1, 2-O-Ac | M2         | 4.9                  | 99.65                 | 5.42, 5.52           | 72.72                 | 4.04                 | 71.16                 | 3.82                 | 77.06                 | 3.53       | 76.14     |       |       |       |
|                        | β-Manp-R              | Mbr        | 4.88, 4.91           | 94.77                 |                      |                       |                      |                       |                      |                       |            |           |       |       |       |
|                        | -4)-β-Manp-(1, 3-O-Ac | M3         | 4.83                 | 100.72                | 4.12, 4.2            | 69.8                  | 5.11                 | 74.48                 | 4.04                 | 74.28                 |            |           |       |       |       |
| β-Manp-(1-             | M                     | 4.76       | 101.21               | 4.07                  | 71.55                | 3.64                  | 73.89                | 3.57                  | 67.75                | 3.43                  | 77.05      | 3.94      | 61.99 | 4     | 61.31 |
| -4)-β-Manp-(1-         | 4Manb                 | 4.73       | 101.3                | 4.13                  | 71.06                | 3.79, 3.82            | 72.53                | 3.77, 3.81            | 78.48                | 3.45                  | 75.94      | 3.75, 3.9 | 61.6  | 3.81  | 61.8  |
| glucose                | -4)-β-Glcp-(1-        | Glc b      | 4.53                 | 103.55                | 3.36                 | 73.89                 | 3.69                 | 74.97                 | 3.62                 | 79.55                 | 3.79       | 77.05     |       |       |       |
|                        | 4)-β-Glcp-(1-         | Glc b      | 4.52                 | 103.65                |                      |                       |                      |                       | 3.69                 | 79.55                 |            |           |       |       |       |
| galactose              | αGalp-(1-             | Gal a      | 5.03                 | 99.84                 | 3.82                 | 69.05                 | 3.94                 | 70.48                 | 4.01                 | 70.28                 | 3.91       | 71.94     | 3.75  | 62.29 |       |
| Other polysaccharides  |                       |            |                      |                       |                      |                       |                      |                       |                      |                       |            |           |       |       |       |
| arabino-glucuronoxylan | -3,4)-β-Xylp-(1-      | X34b       | 4.48, 4.49           | 102.77                |                      |                       |                      |                       |                      |                       |            |           |       |       |       |
|                        | -4)-β-Xylp-(1-        | X4b        |                      |                       |                      |                       | 3.56                 | 73.8                  |                      |                       | 3.36, 4.13 | 64.04     |       |       |       |
|                        | α-GlcpA-(1-2          | aGlc       |                      |                       | 3.56                 | 72.33                 |                      |                       |                      |                       |            |           |       |       |       |
|                        | α-Araf-(1-3           | Ara 3      | 5.28 <sup>1</sup>    |                       |                      |                       |                      |                       |                      |                       |            |           |       |       |       |
| β-Galactan             | -4)-β-Galp-(1-        | Gal b      | 4.64                 | 105.5                 |                      |                       |                      |                       | 4.18                 | 78.77                 |            |           |       |       |       |
| Arabinogalactan        | -3)-β-Galp-(1-        | Gal 3b     | 4.68                 | 105.11                |                      |                       |                      |                       |                      |                       |            |           |       |       |       |

<sup>1</sup>from 1D 1H spectrum

## SP Mannose region assignment:

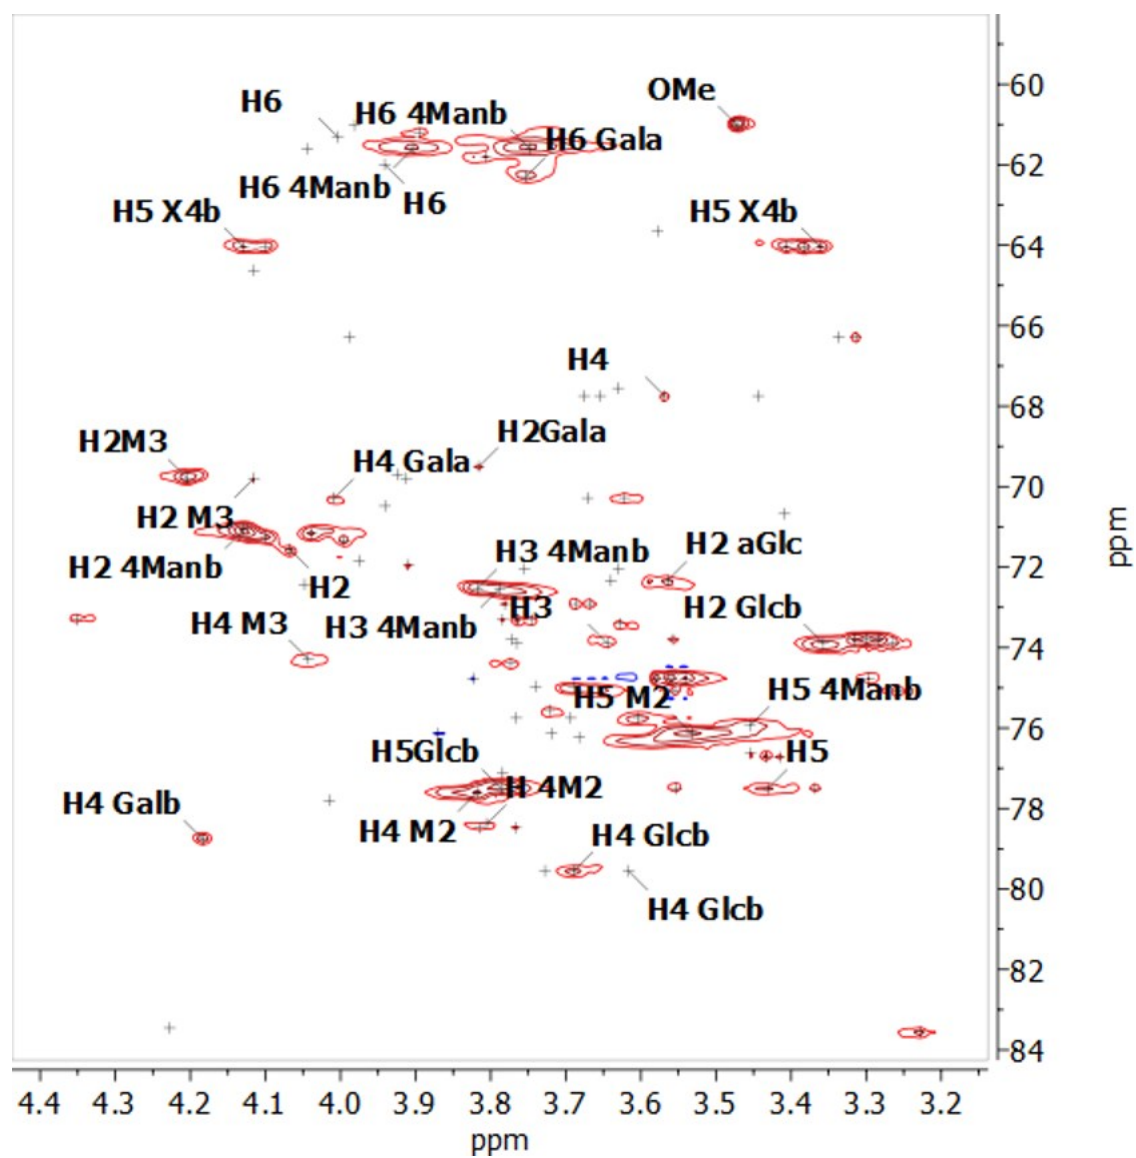

Figure S1 Assignment of cross peaks for mannose in HSQC (Table S2).

DLS autocorrelation functions:

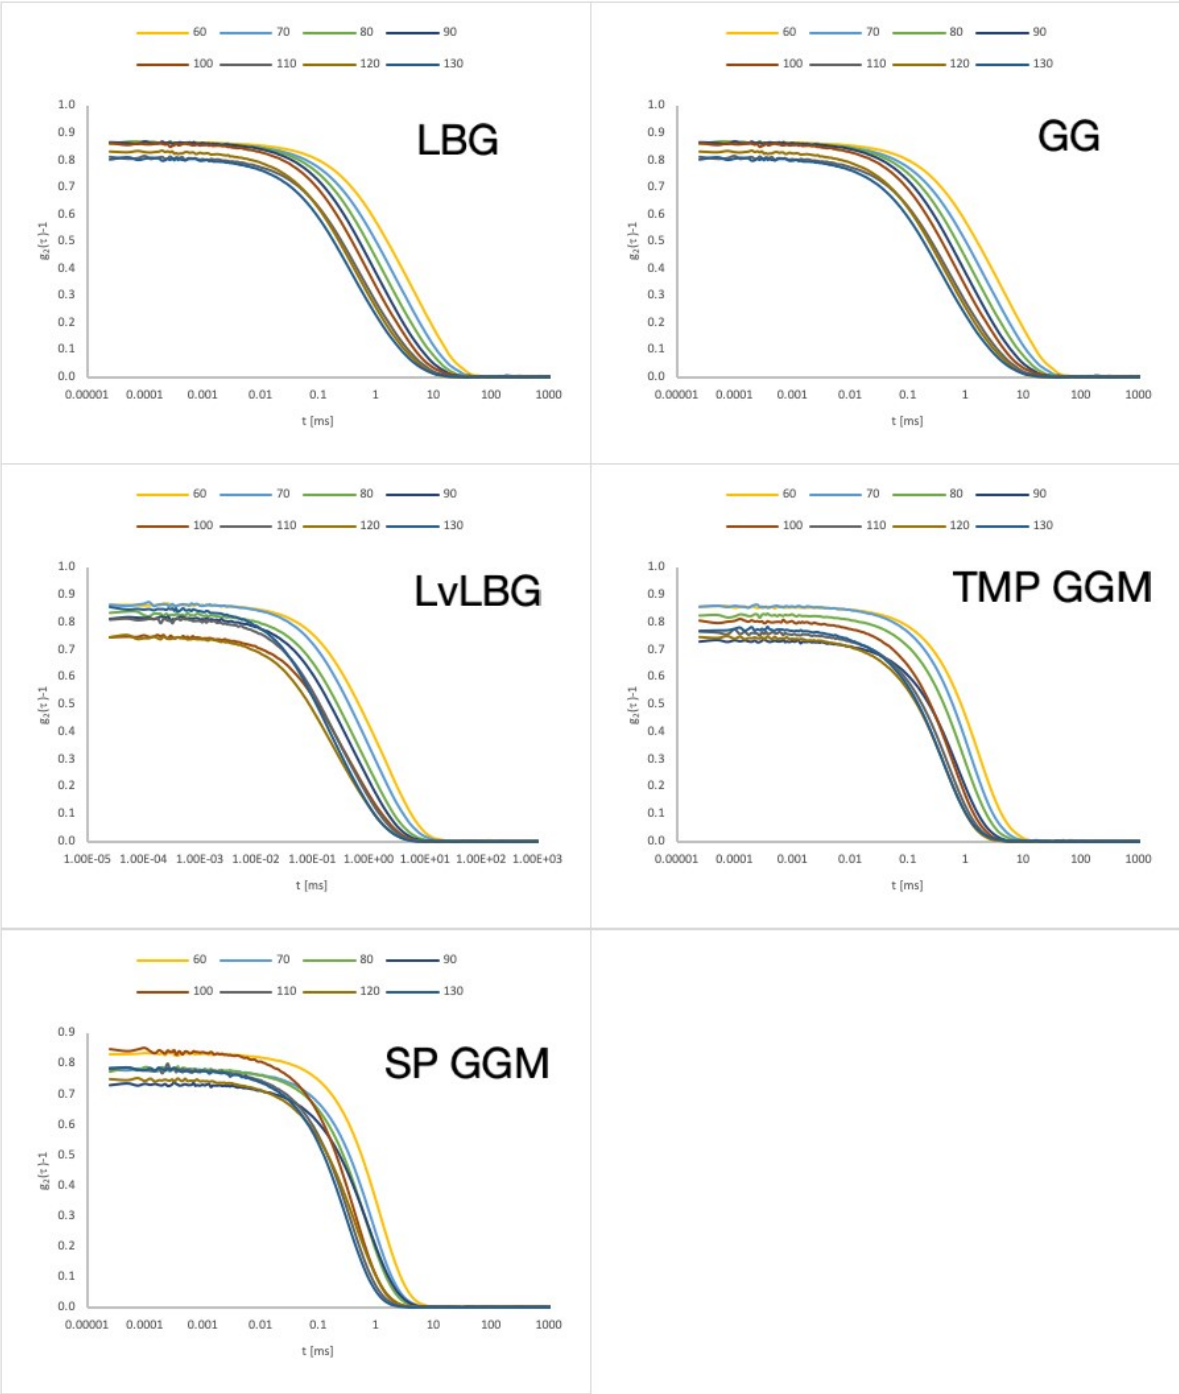

Figure S2 Dynamic light scattering correlation functions of mannans obtained for different angles.

### SAXS scattering curves:

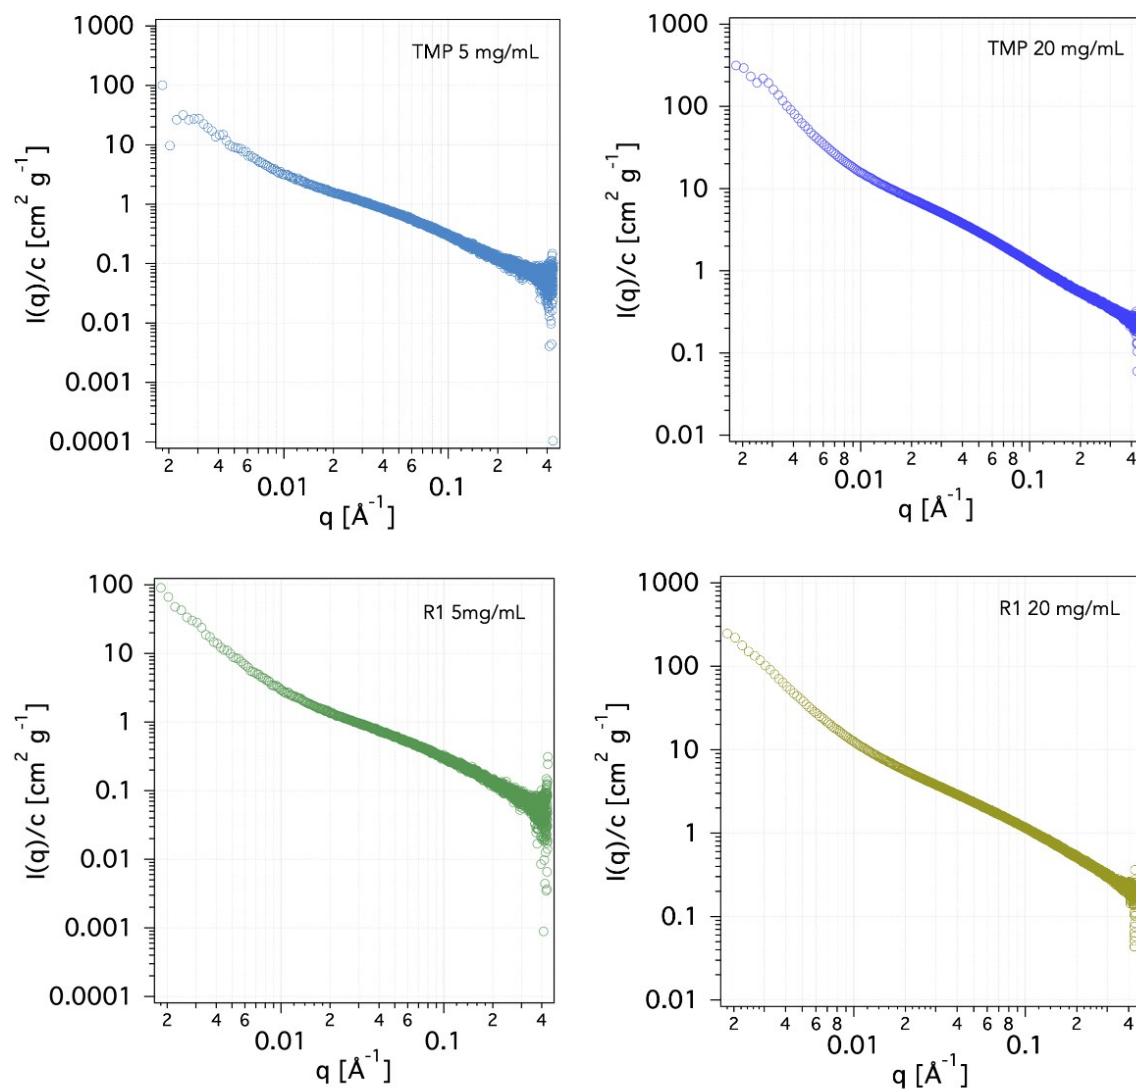

Figure S3 Scattering curves of TMP and SP GGM samples at concentrations of 5 mg/mL and 20 mg/mL.

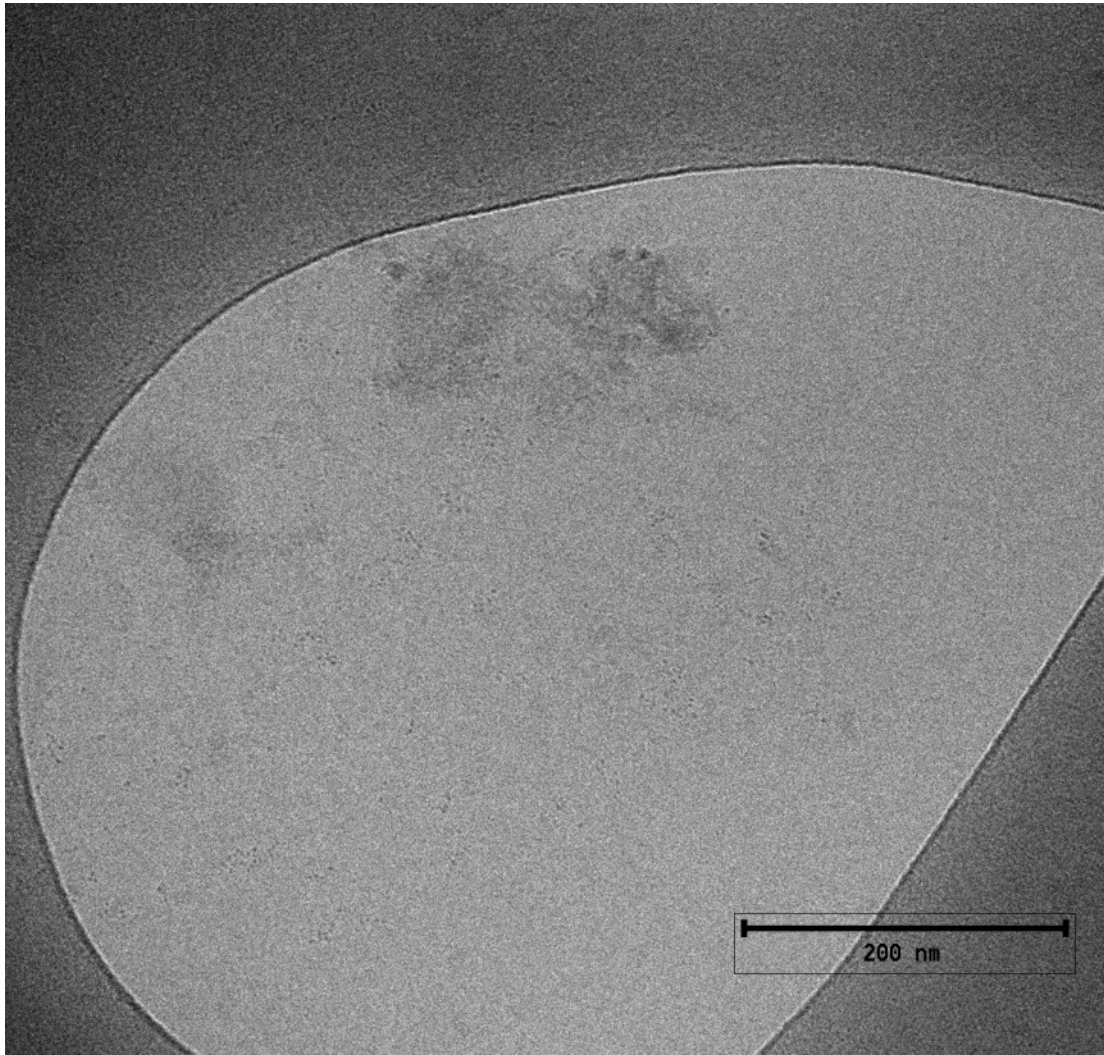

Figure S4 Cryo-TEM image of TMP GGM

**Table S3 Ellipsometry results obtained by fitting experimental data on cellulose surface to a 3-layer model.**

|   | Layer     | Refractive index | Thickness [Å] | Adsorbed amount [mg/m <sup>2</sup> ] |      |
|---|-----------|------------------|---------------|--------------------------------------|------|
| 1 | LBG       | 1.416            | 57            | 3.1                                  |      |
|   | Cellulose | 1.424            | 450           | 28.1                                 |      |
|   | SiOn      | 1.470            | 274           |                                      |      |
|   | Si        | 5.512            |               |                                      |      |
| 2 | LBG       | 1.408            | 50            | 2.4                                  |      |
|   | Cellulose | 1.420            | 460           | 27.4                                 |      |
|   | SiOn      | 1.466            | 279           |                                      |      |
|   | Si        | 5.475            |               |                                      |      |
| 1 | GG        | 1.418            | 44            | 2.5                                  |      |
|   | Cellulose | 1.423            | 460           | 28.4                                 |      |
|   | SiOn      | 1.467            | 297           |                                      |      |
|   | Si        | 5.515            |               |                                      |      |
|   | 2         | GG               | 1.413         | 56                                   | 2.9  |
|   |           | Cellulose        | 1.421         | 414                                  | 24.9 |
|   |           | SiOn             | 1.465         | 270                                  |      |
|   |           | Si               | 5.470         |                                      |      |
| 1 | LvLBG     | 1.421            | 37            | 2.2                                  |      |
|   | Cellulose | 1.425            | 394           | 24.9                                 |      |
|   | SiOn      | 1.472            | 268           |                                      |      |
|   | Si        | 5.478            |               |                                      |      |
|   | 2         | LvLBG            | 1.418         | 35                                   | 2.0  |
|   |           | Cellulose        | 1.423         | 439                                  | 27.1 |
|   |           | SiOn             | 1.471         | 267                                  |      |
|   |           | Si               | 5.479         |                                      |      |
| 1 | TMP       | 1.417            | 38            | 1.9                                  |      |
|   | Cellulose | 1.413            | 438           | 23.7                                 |      |
|   | SiOn      | 1.472            | 278           |                                      |      |
|   | Si        | 5.478            |               |                                      |      |
|   | 2         | TMP              | 1.417         | 39                                   | 2.0  |
|   |           | Cellulose        | 1.423         | 486                                  | 30.0 |
|   |           | SiOn             | 1.471         | 260                                  |      |
|   |           | Si               | 5.477         |                                      |      |
| 1 | SP        | 1.416            | 41            | 2.0                                  |      |
|   | Cellulose | 1.42             | 411           | 24.4                                 |      |
|   | SiOn      | 1.468            | 276           |                                      |      |
|   | Si        | 5.478            |               |                                      |      |
|   | 2         | SP               | 1.412         | 37                                   | 1.7  |
|   |           | Cellulose        | 1.417         | 432                                  | 24.7 |
|   |           | SiOn             | 1.468         | 261                                  |      |
|   |           | Si               | 5.481         |                                      |      |

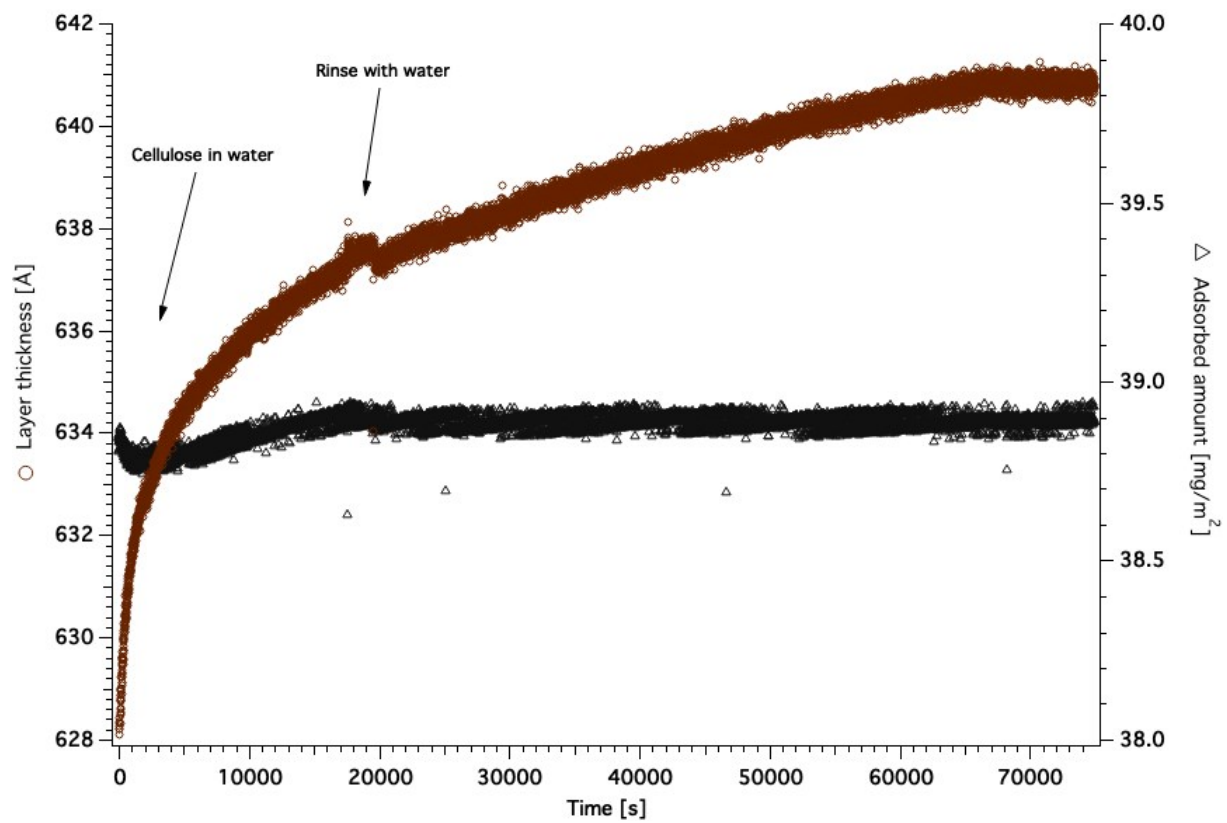

Figure S5 Cellulose film swelling in water as observed with null ellipsometry



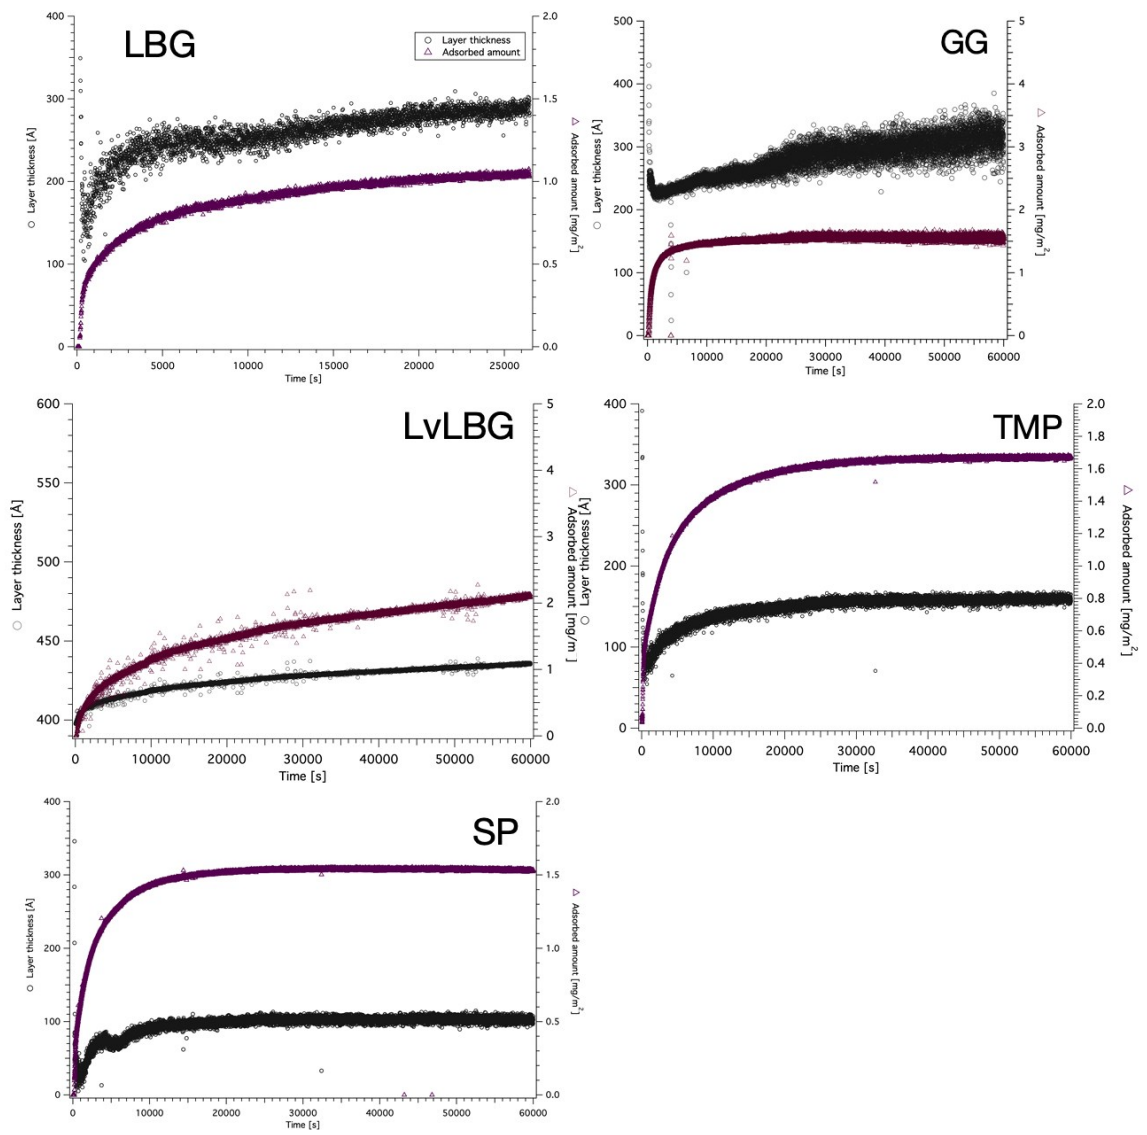

Figure S6 Mannan adsorption on hydrophobic surface measured with ellipsometry

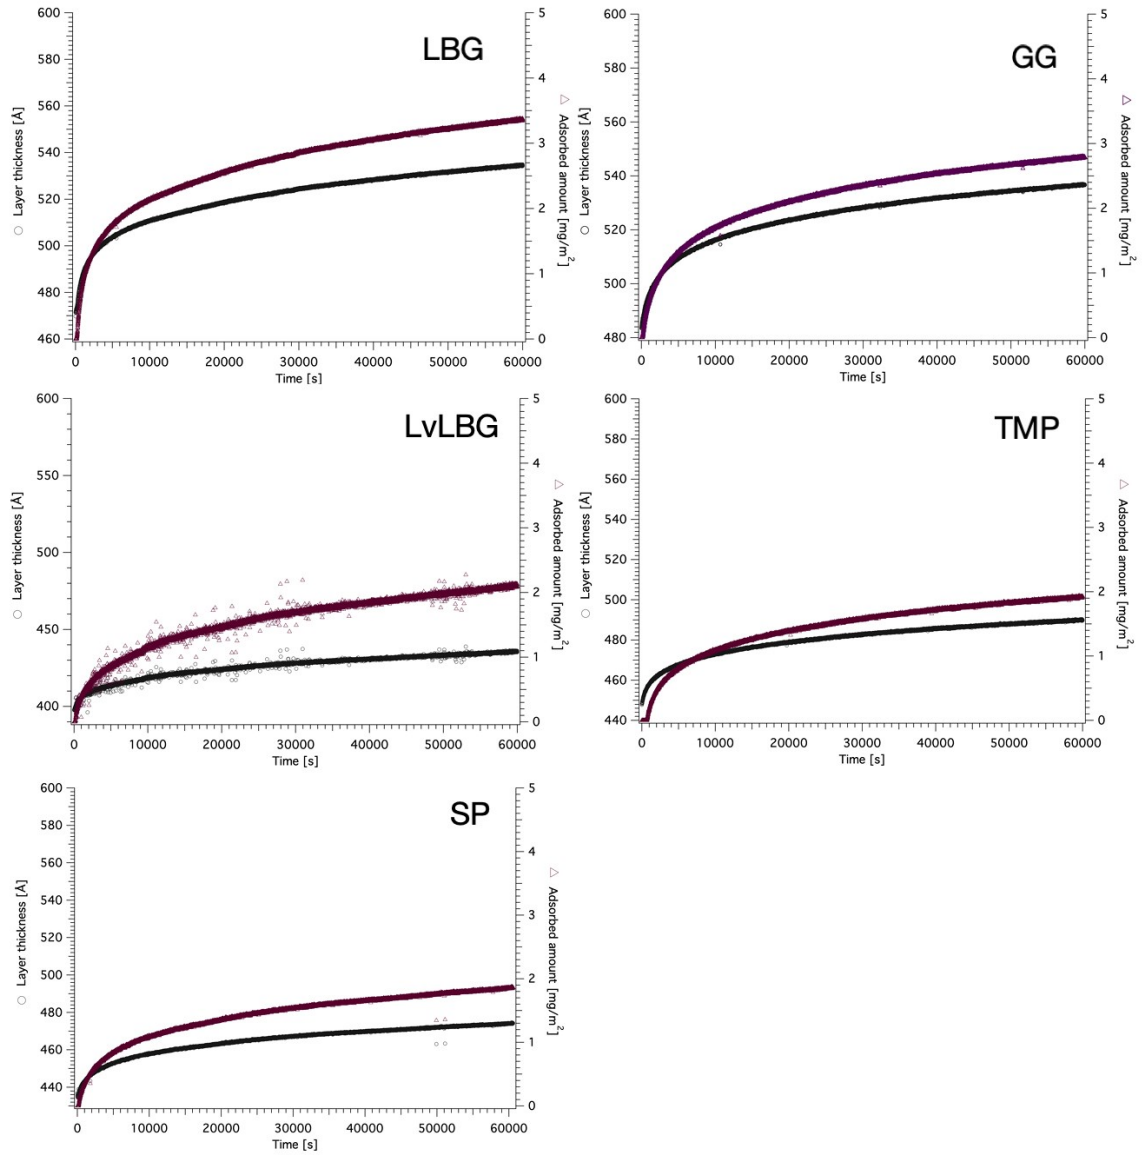

Figure S7 Mannan adsorption on cellulose surface measured with ellipsometry

## QCM-D data and fitting:

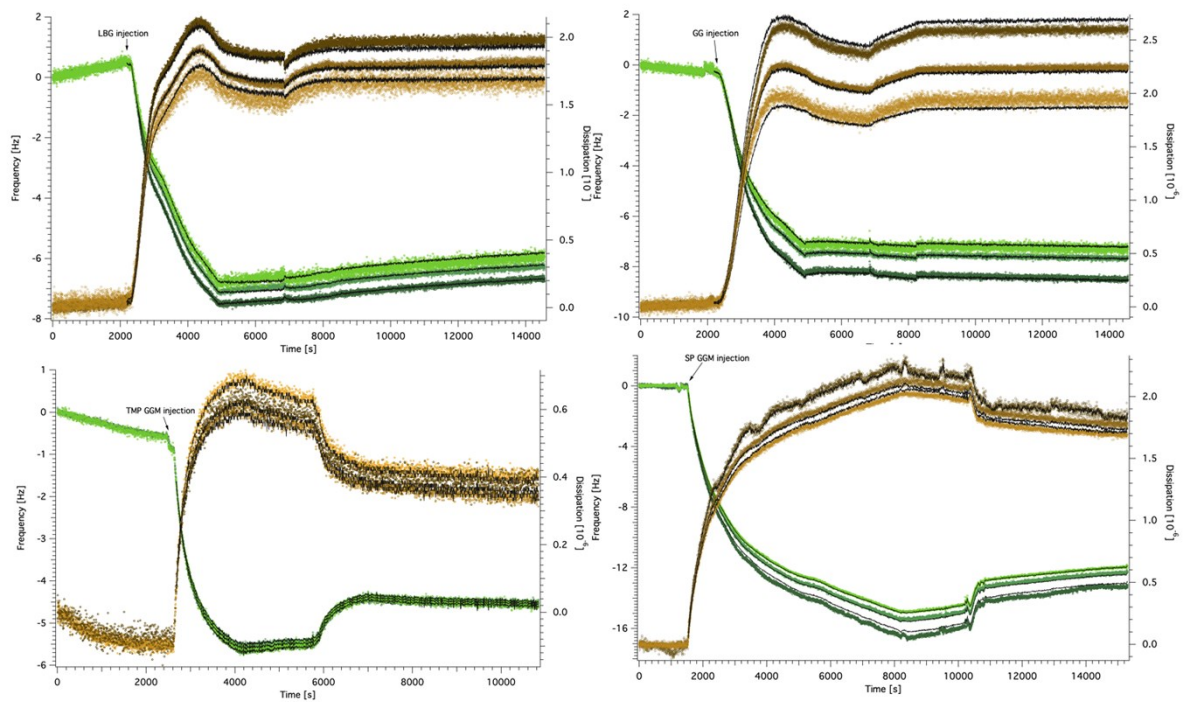

Figure S8 Mannan adsorption on hydrophobic surface measured with QCM-D. Results were fitted to the Voigt viscoelastic model using at least three overtones. Theoretical fit is represented by solid lines.

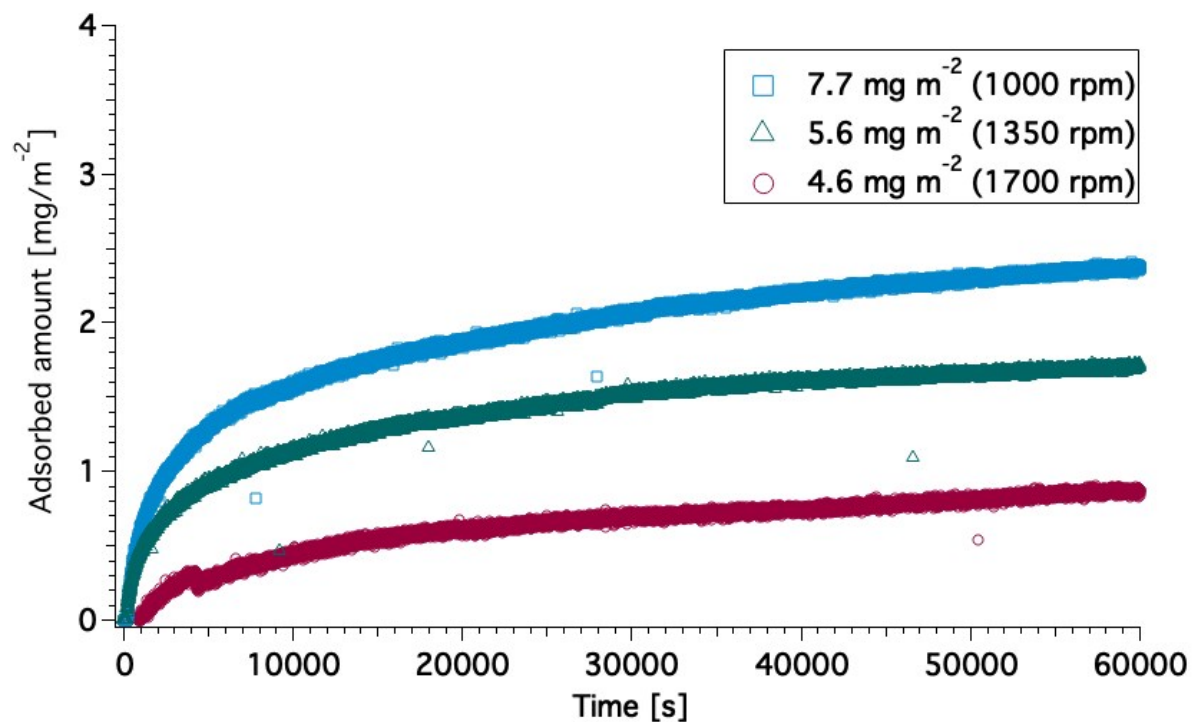

Figure S9 The adsorbed amount of GG on the cellulose films spin coated at different speeds determined with ellipsometry
